# Supplementary material
Source: PubMed Central journal article supplement (PMC3826461)
Supplement: NIHMS517917-supplement-Supporting_Information.pdf [file NIHMS517917-supplement-Supporting_Information.pdf]

## **Synthetic Hemozoin ( $\beta$ -Hematin) Crystals Nucleate at the Surface of Neutral Lipid Droplets that Control Their Sizes**

Melvin A. Ambele,<sup>†</sup> B. Trevor Sewell,<sup>§</sup> Franscious R. Cummings,<sup>§</sup> Peter J. Smith<sup>‡</sup> and Timothy J. Egan<sup>\*,†</sup>

*Department of Chemistry, Electron Microscope Unit and Division of Clinical Pharmacology, Department of Medicine, University of Cape Town, Private Bag, Rondebosch 7701, South Africa*

## **Supporting Information**

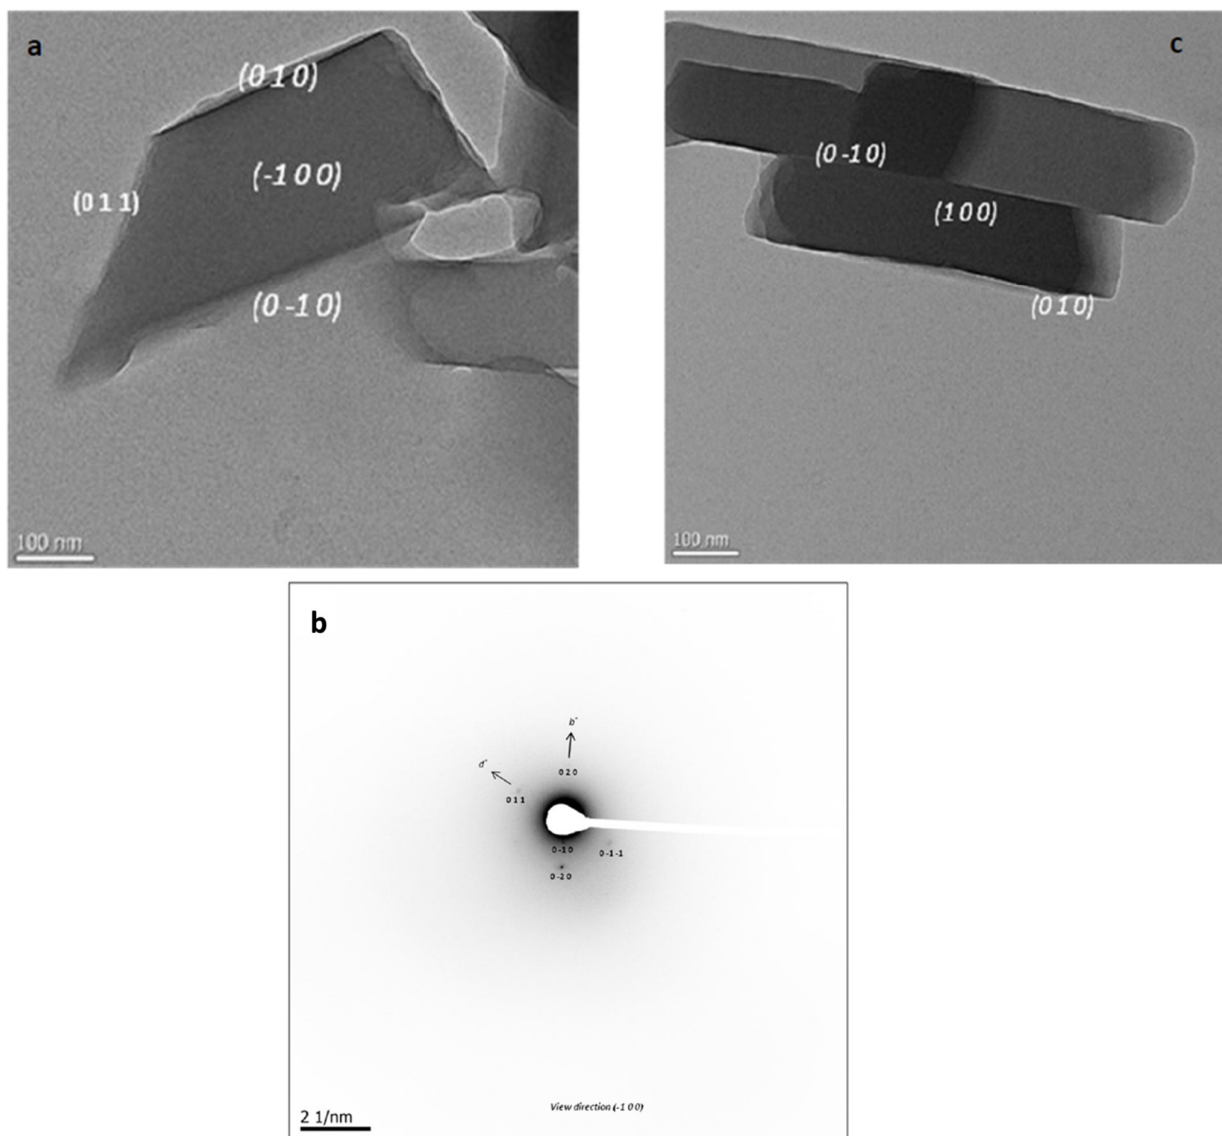

**Figure S1.** TEM images (a) and (c) of hemozoin crystals and (b) electron diffraction pattern from the crystals shown in (c).

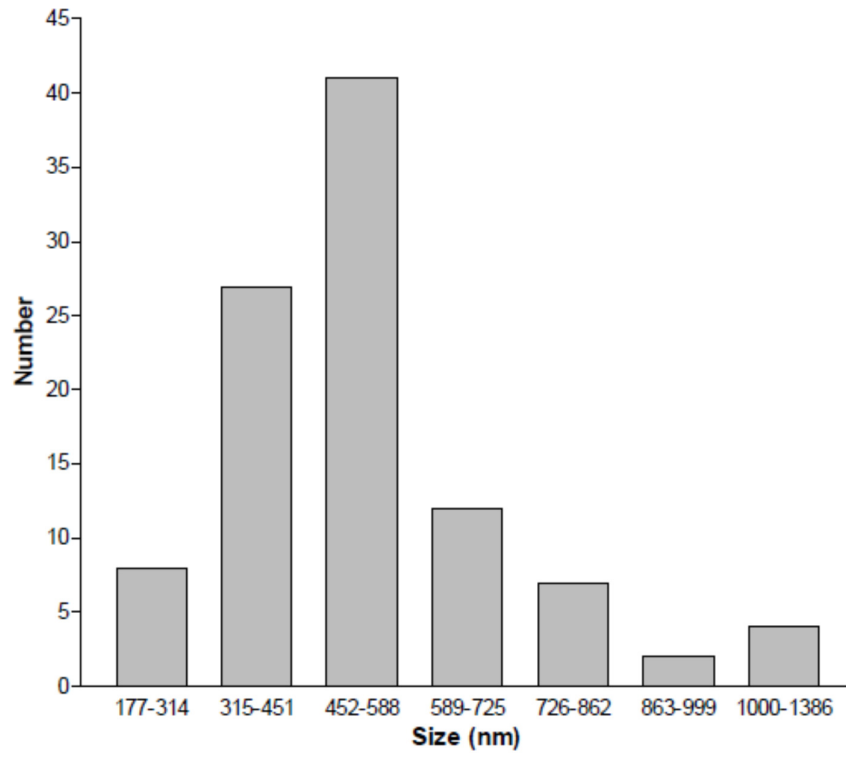

**Figure S2.** Distribution of hemozoin crystals sizes.

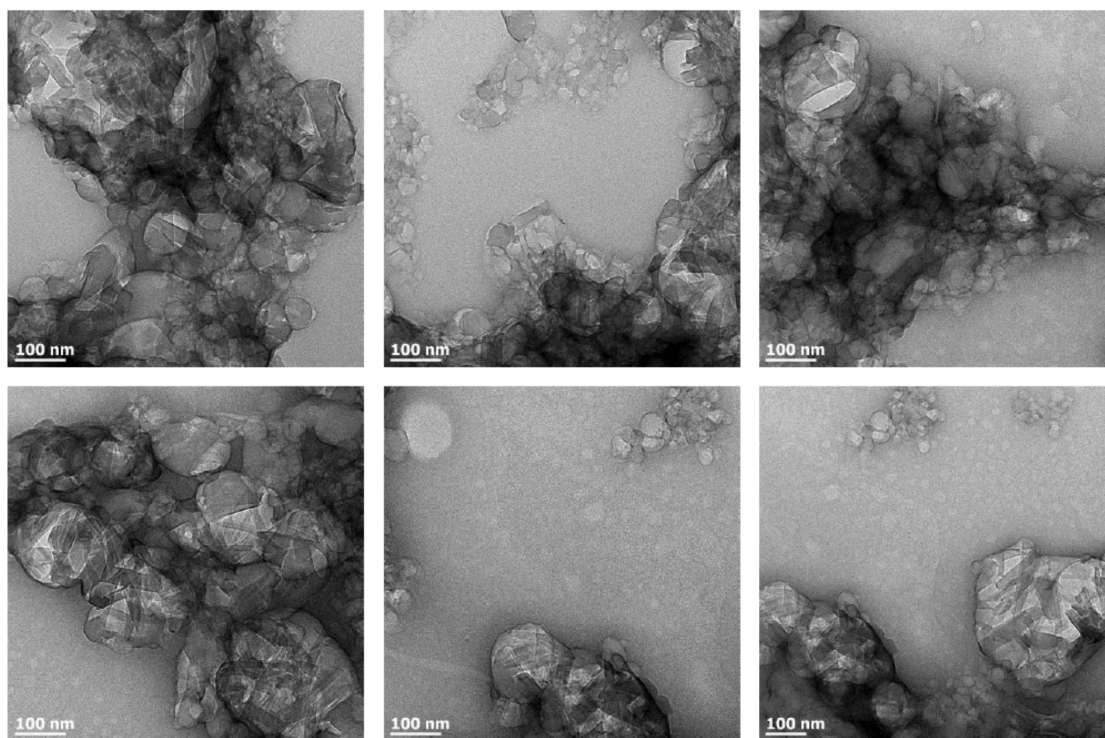

**Figure S3.** Examples of  $\beta$ -hematin crystals associated with MPG droplets.

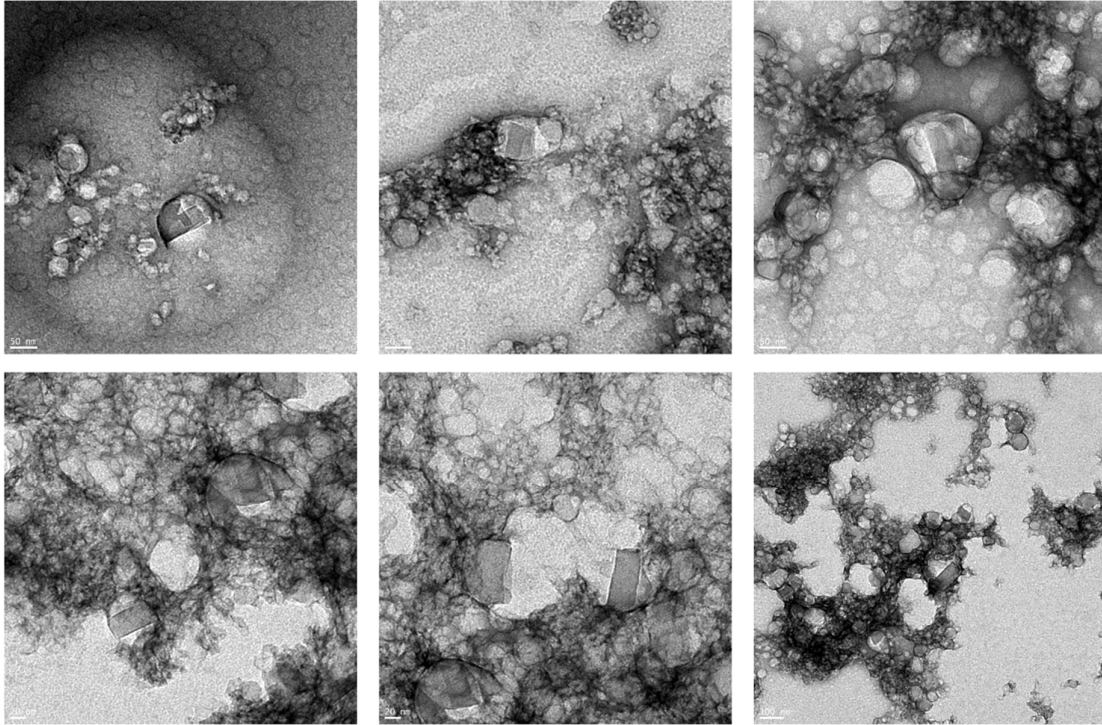

**Figure S4.** Examples of  $\beta$ -hematin crystals associated with NLB droplets after 30 min incubation.

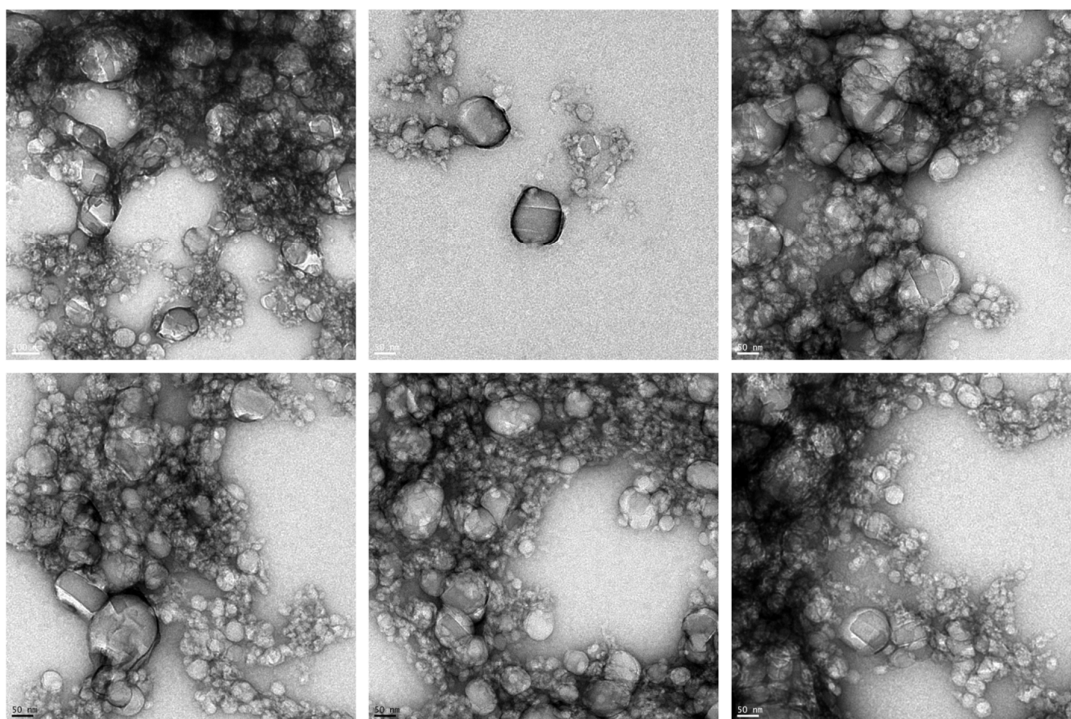

**Figure S5.** Examples of  $\beta$ -hematin crystals associated with NLB droplets after 60 min incubation.

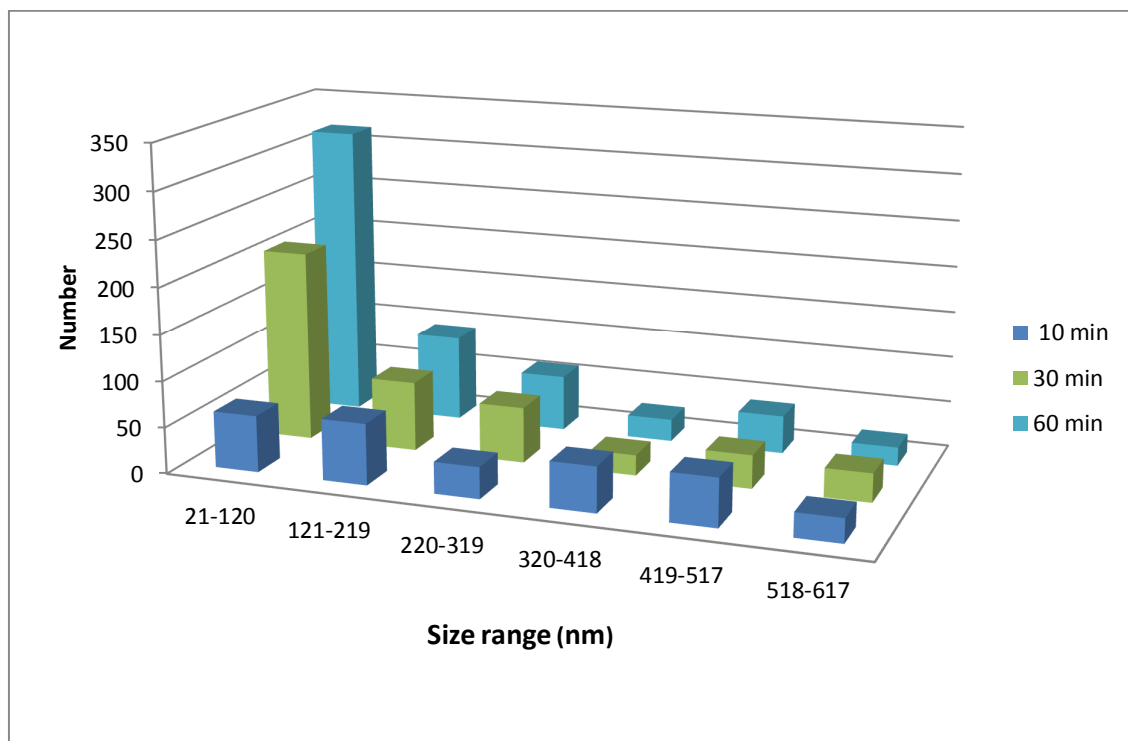

**Figure S6.** Distribution of NLB droplet sizes after 10, 30 and 60 min incubation showing the increasing proportion of small droplets (<120 nm) with time.

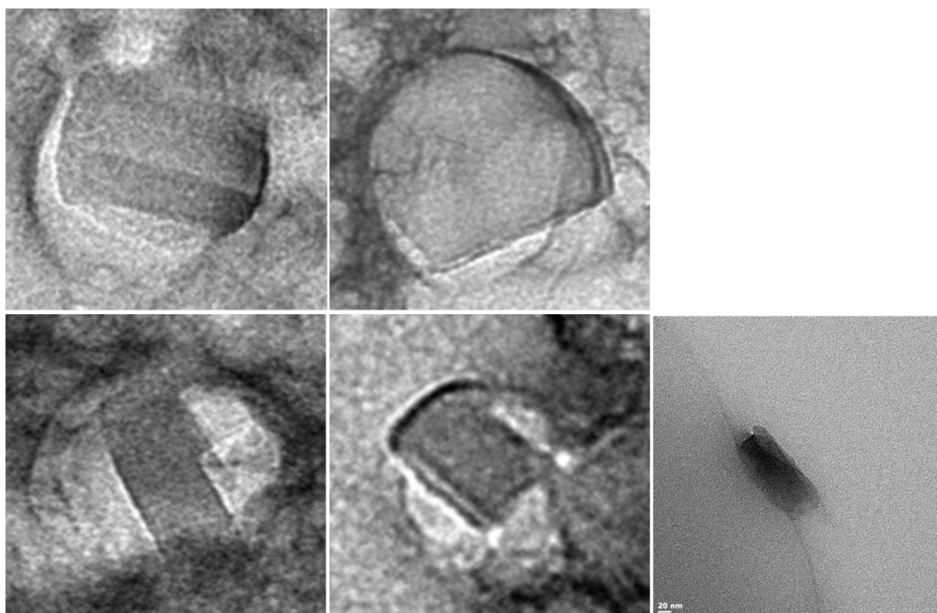

**Figure S7.** Examples of TEM images showing that  $\beta$ -hematin crystals lay on the surfaces of NLB droplets.
